# Supplementary material
Source: PubMed Central journal article supplement (PMC9911362)
Supplement: NIHMS1857932-supplement-3.pdf [file NIHMS1857932-supplement-3.pdf]

# SUPPLEMENTAL INFORMATION

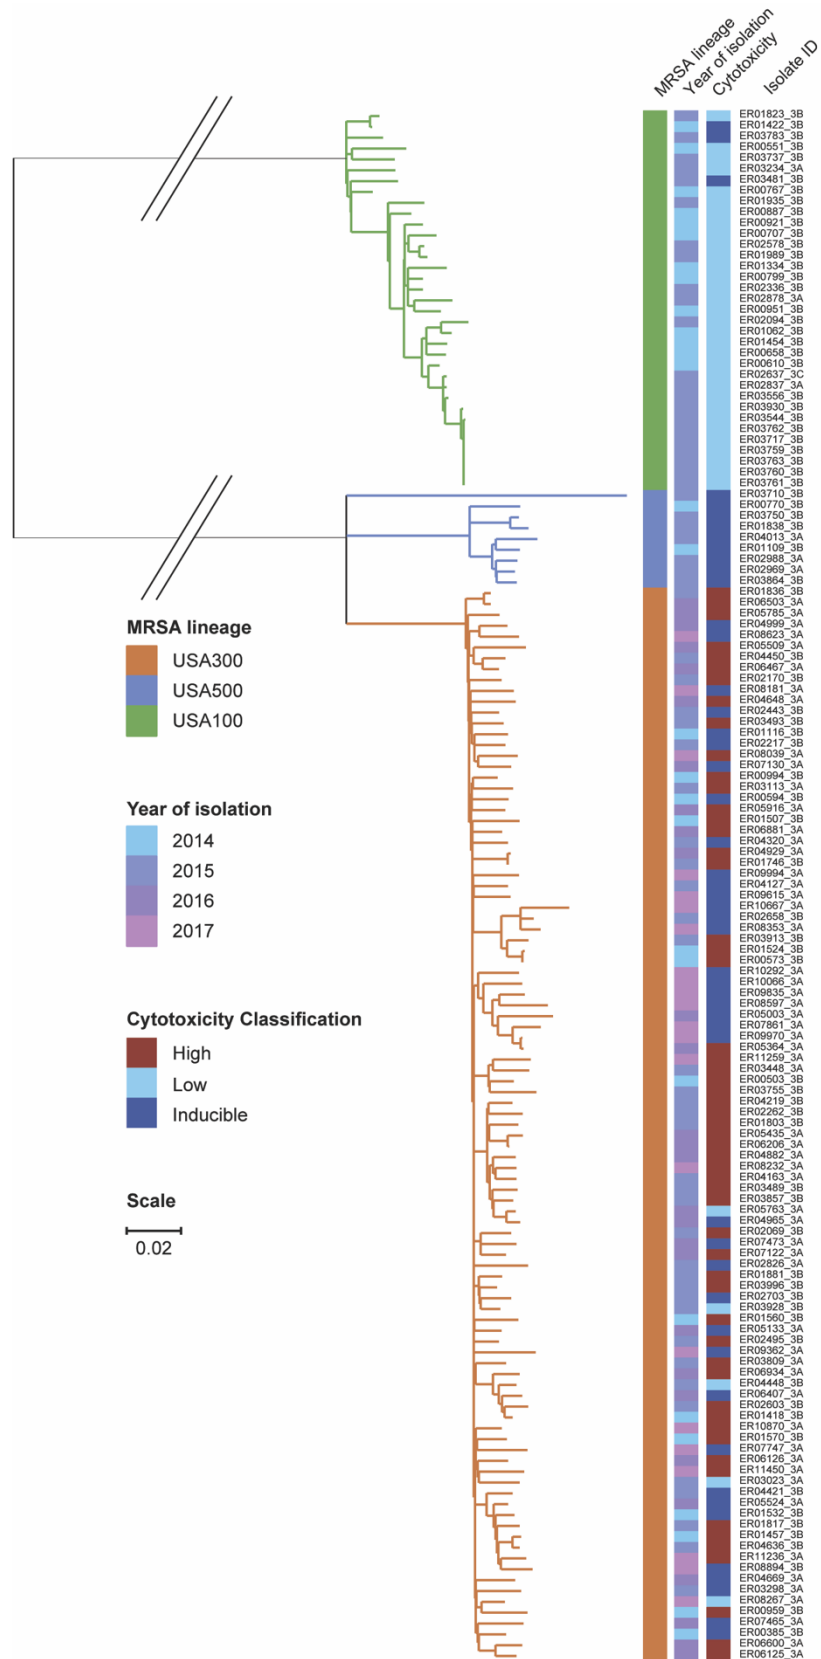

**Supplementary Figure 1. Phylogenetic tree of all BSI isolates, related to Figure 1.**

Phylogenetic tree of all BSI isolates used in this study with USA group, year and cytotoxicity classification shown on the right-hand side.

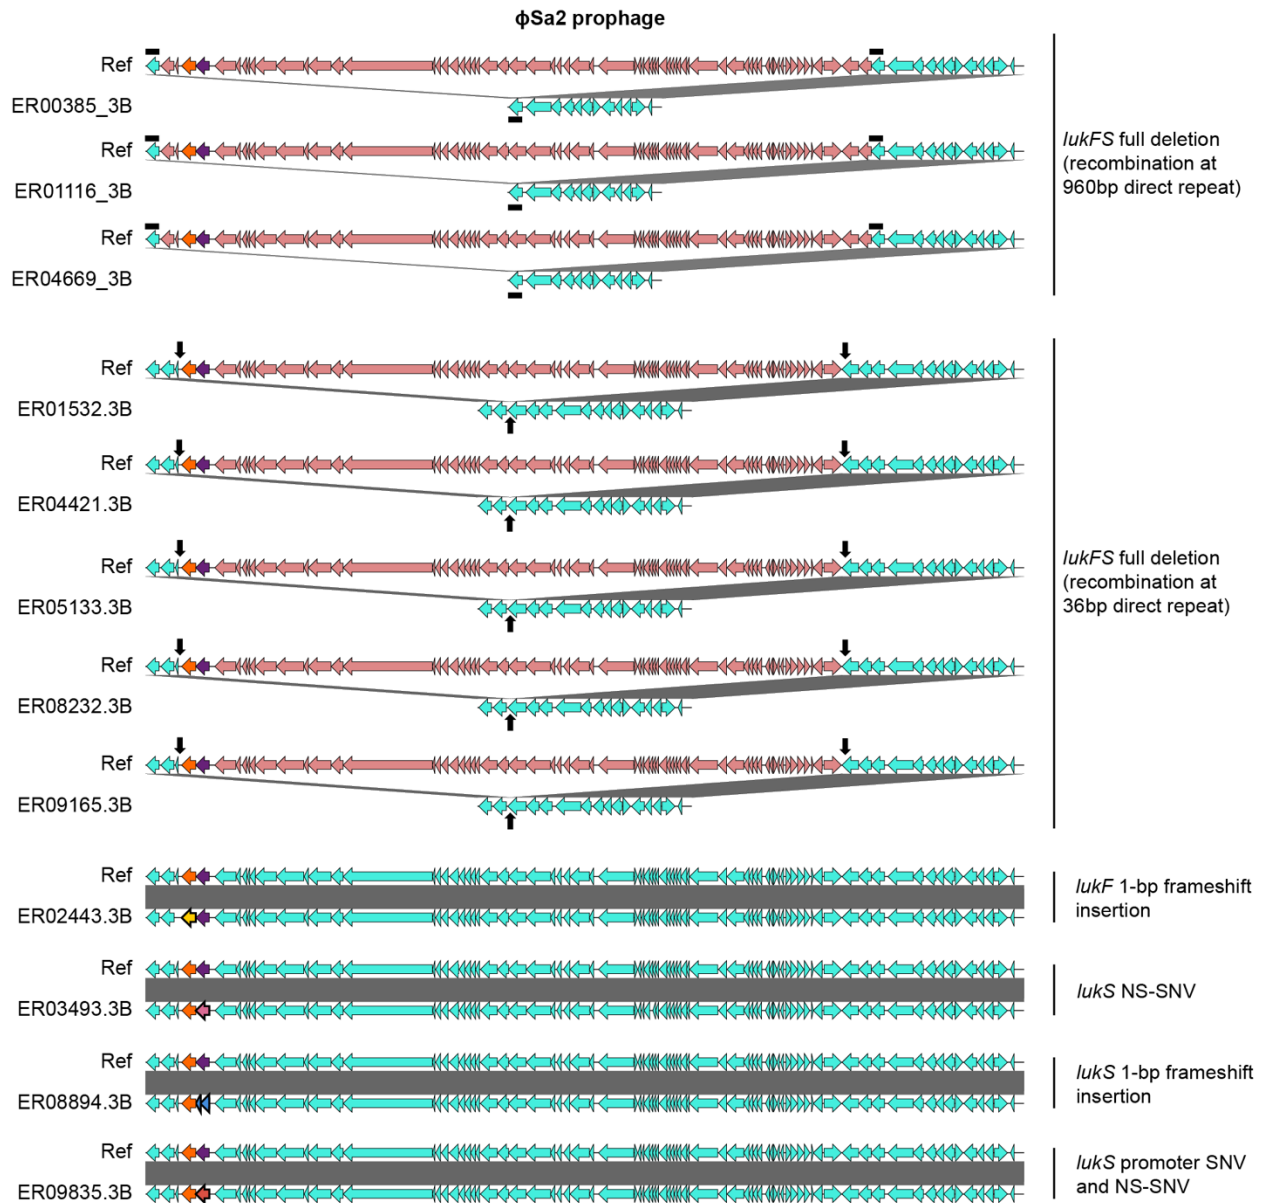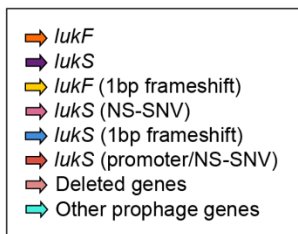

**Supplementary Figure 2. Changes found in the PVL phage, related to Figure 2.**

Pairwise genome comparisons of isolates with complete deletion or mutation of one or both genes in the *lukSF-PV* locus. Each isolate is compared to the PVL phage of *Staphylococcus aureus* USA300\_FPR3757 (NC\_007793.1) using Easyfig[S1]. Gray blocks indicate regions of alignment between the genomes determined by BLASTn. Arrows indicate predicted genes and colored according to the key shown below.



in global **(C)** USA300 and **(D)** USA100 MRSA genomes from Genbank between 2000 and 2020. Each panel includes the fraction (top) and number (bottom) of genomes with a specific combination of mutations and/or gene loss (legend at bottom). **(E)** Number of USA300 genomes with a disease annotated in the Biosample data and a *sarZ* mutation identical to one observed in our dataset. X-axis labels indicate the type of disease with the total number of USA300 isolates in brackets. **(F)** Same as E, but now showing the distribution across countries.

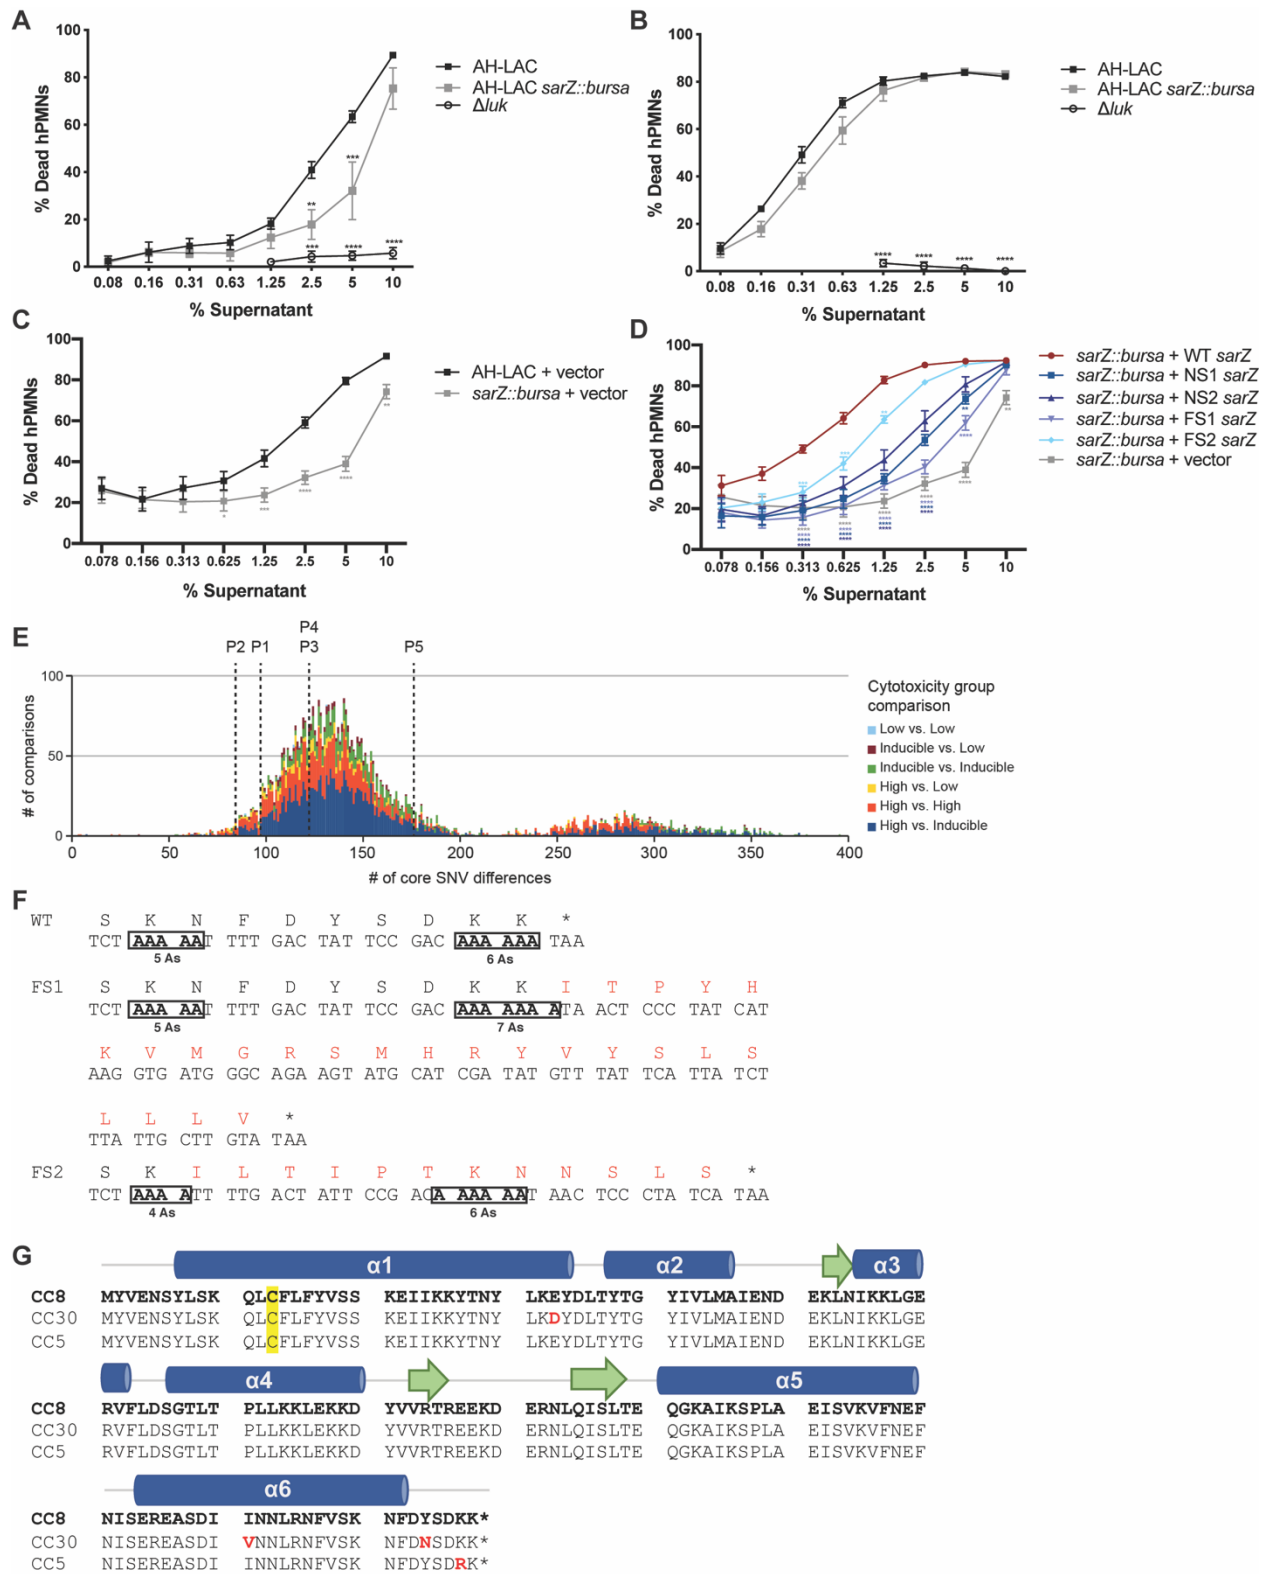

**Supplementary Figure 4. Examining naturally occurring *sarZ* mutations, related to Figure 3. Panels A-D are cytotoxicity titration curves, showing each concentration of**

USA300 supernatant tested for cytotoxicity to hPMNs. Representative concentrations are depicted in Fig.3 for simplicity. **(A)** AH-LAC, AH-LAC *sarZ::bursa* and AH-LAC  $\Delta luk$  strains grown in TSB, n = 4 donors. Statistical significance comparing AH-LAC to mutants. **(B)** AH-LAC, AH-LAC *sarZ::bursa* and AH-LAC  $\Delta luk$  strains grown in YCP, n = 4 donors. Statistical significance comparing AH-LAC to mutants. **(C)** AH-LAC + vector and AH-LAC *sarZ::bursa* + vector strains grown in TSB, n = 8 donors. Statistical significance comparing AH-LAC + vector to mutant. **(D)** AH-LAC *sarZ::bursa* strains complemented with *sarZ* alleles grown in TSB, n = 8 donors. Statistical significance comparing AH-LAC *sarZ::bursa* + *sarZ*<sup>WT</sup> to other strains. Comparisons for all panels were done using a 2-way ANOVA, Sidak's multiple comparisons test. Error bars indicate SEM. \*P < 0.05, \*\*P < 0.01, \*\*\*P < 0.001, \*\*\*\*P < 0.0001, color indicates the sample the P-value corresponds to. **(E)** Histogram showing relatedness of pairs. All-versus-all pairwise core-genome SNV distances between all USA300 isolates used in this study. Color indicates the phenotype of pairs at that distance (key on right). Vertical dotted lines indicate where each of the five experimental pairs (P1-P5) falls in the distribution. Pairs were chosen to minimize total pairwise difference between inducible and non-inducible strains. **(F)** Nucleotide and amino acid sequences of *sarZ* alleles starting at S139. WT = wild type USA300 *sarZ* allele found in AH-LAC. The indel/frameshift mutant alleles found in USA300 BSI isolates are aligned below with amino acid differences highlight in red. The two polyA stretches are shown in boxes with the number of adenines within the stretch written underneath. For FS1, there is an insertion into the second polyA stretch. For FS2, there is a deletion in the first polyA stretch. **(G)** Amino acid sequence of *sarZ* alleles from three different clonal complexes. CC8 = USA300 *sarZ* allele found in NCBI reference sequence FPR3757 (NC\_007793.1). CC30 = USA200 *sarZ* allele found in MRSA252 (GenBank: BX571856.1). CC5 = USA100 *sarZ* allele found in NCBI reference sequence (NZ\_CP021105.1). The major structural features of SarZ are shown above, where alpha helices are blue, beta sheets are represented by green arrows, and the critical cysteine (Cys13) is highlighted in yellow.



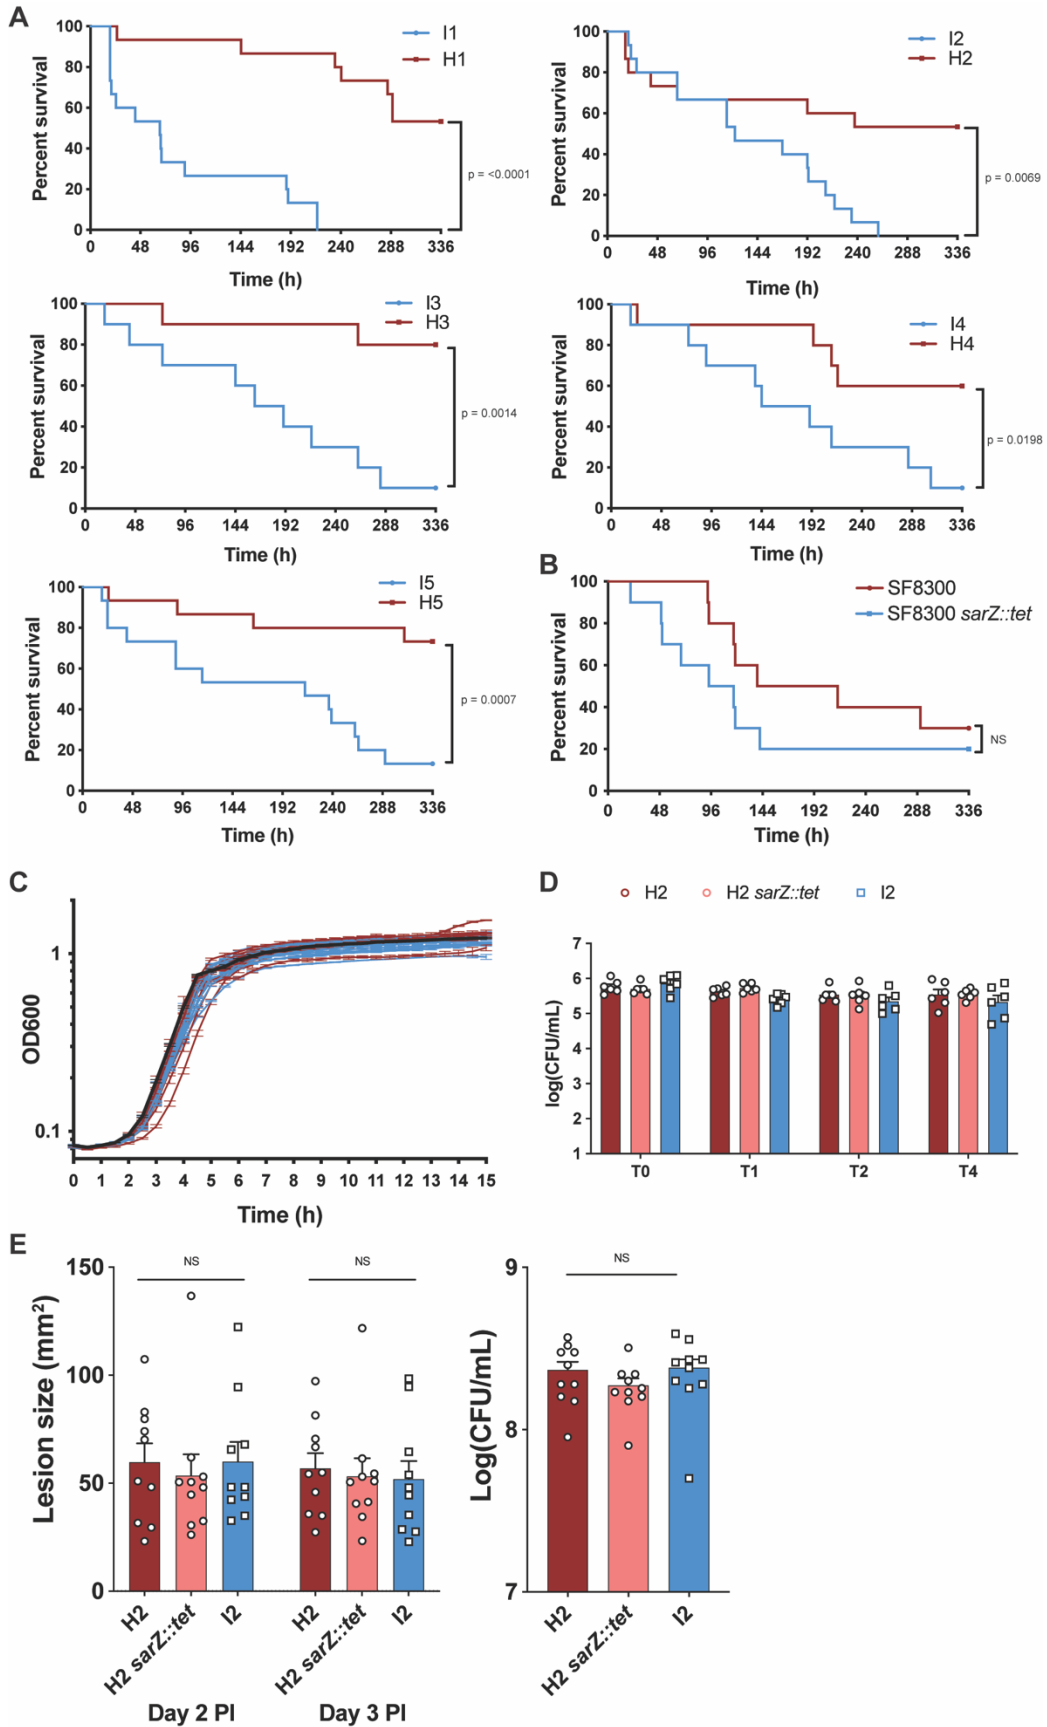

**Supplementary Figure 5. Increased virulence of *sarZ* mutants specific to BSI, related to Figure 4. (A)** Survival of mice infected i.v. ( $5 \times 10^7$  CFU) with USA300 BSI isolates. Inducible USA300 (I1-I5) that have mutations in *sarZ* are shown in blue. Closely related high cytotoxicity USA300 (H1-5) that have a WT *sarZ* locus are shown in red (n = 10-15). Pooled data shown in Fig. 5A. **(B)** Survival of mice infected i.v. ( $5 \times 10^7$  CFU) with USA300 strain SF8300 or SF8300 *sarZ::tet*. **(C)** Growth curves of clinical isolates used in Figure 5A in TSB media. High cytotoxicity isolates (H1-5) are in red, inducible isolates (I1-5) are in blue, AH-LAC control is in black. **(D)** Whole blood survival of clinical isolates that have differing phenotypes in bloodstream infections. Human venous whole blood was infected at  $\sim 10^6$  CFU/mL. At each time point (T = 0, 1, 2 and 4h post-infection), CFU were enumerated. **(E)** Abscess size and CFU counts of mice with skin infections using USA300 clinical isolates that have differing phenotypes in bloodstream infections. Mice were infected subcutaneously ( $1 \times 10^7$  CFU). Lesion size was measured Day 2 and 3 post-infection (PI). Lesions were harvested and CFU enumerated on Day 3 PI. Statistical significance using a 2-way ANOVA with Sidak's multiple comparisons test. Error bars indicate SEM. NS not significant. Statistical analysis for survival curves done with the Log-rank (Mantel-Cox) test.

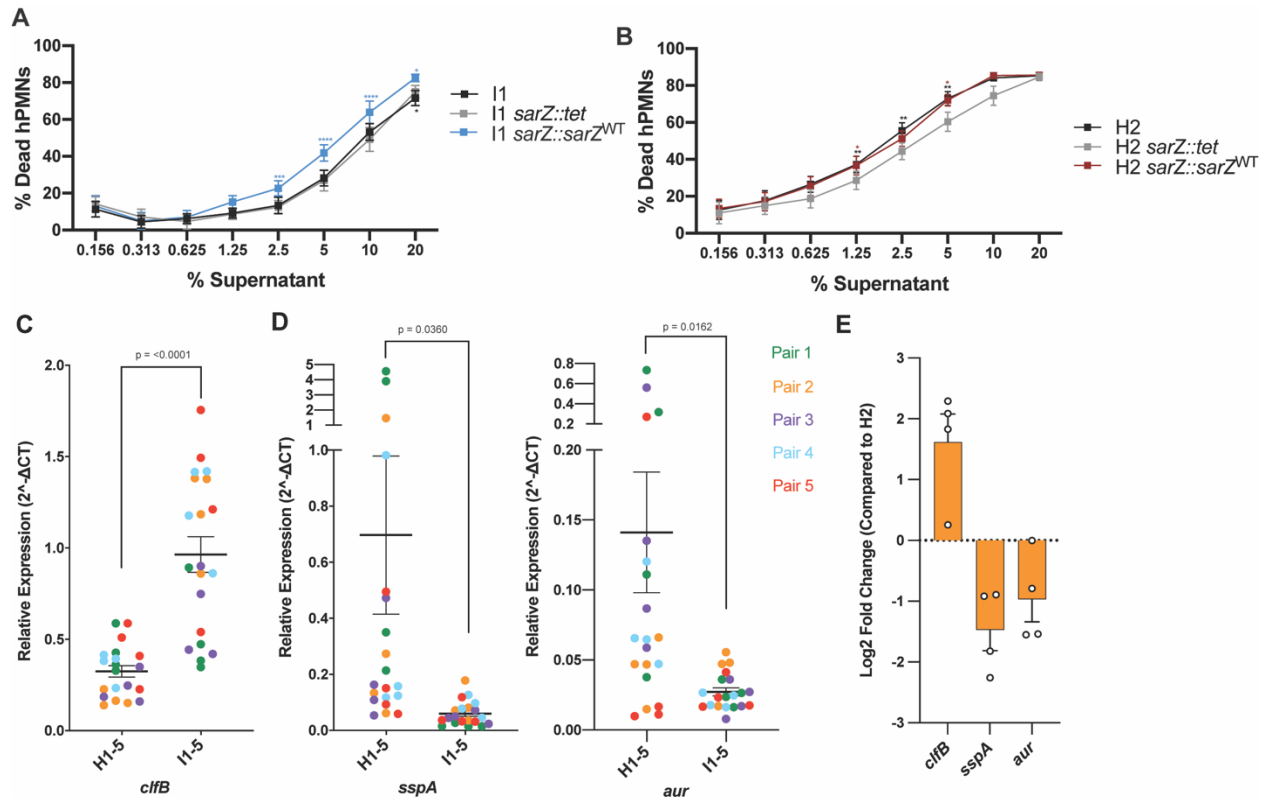

**Supplementary Figure 6. Confirmation of strains and results for RNA-seq, related to Figure 5. (A)** I1, and **(B)** H2, *sarZ::tet* mutant and WT *sarZ* complemented strains grown to stationary phase in TSB, n = 10 donors. Statistical significance comparing *sarZ::tet* strains to parental and WT *sarZ* complement. **(C-D)** qRT-PCR of USA300 BSI isolates grown 3h in TSB (n=4). High cytotoxicity isolates with a WT *sarZ* are pooled (H1-5), as are inducible isolates with a mutated *sarZ* (I1-5). Each dot represents an independent sample, color coded by the isolate. Panel **C** shows the results from *cflB* and panel **D** shows the proteases *sspA* and *aur*. Statistical significance by an unpaired two-tailed t test with Welch's correction. Shapiro-Wilk normality test used to determine use of Welch's correction. **(E)** qRT-PCR of USA300 BSI isolates grown in 50% human serum (n=4). Log<sub>2</sub> Fold Change of inducible isolate I2 compared to closely related high cytotoxic isolate H2.

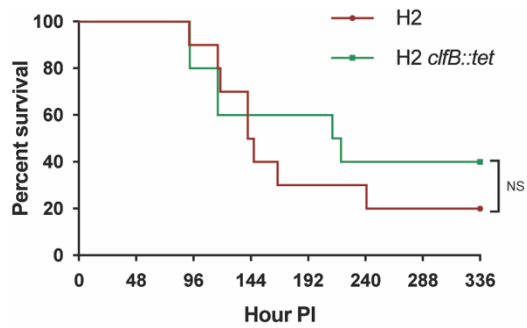

**Supplementary Figure 7. ClfB does not contribute to lethality of a SarZ WT Strain, related to Figure 6.** Survival of mice infected i.v. ( $7.5 \times 10^7$  CFU) with USA300 isolate H2 or H2 *clfB::tet* ( $n=10$ ). Statistical analysis for survival curve done with the Log-rank (Mantel-Cox) test.

**Supplementary Table 1. Demographics and clinical characteristics of USA300 cases, related to Figure 1.**

|                                                | Full Cohort<br>N = 97 |
|------------------------------------------------|-----------------------|
| <b>Variable</b>                                |                       |
| <b>Sex</b>                                     | <b>N (%)</b>          |
| Male                                           | 66 (68.0)             |
| Female                                         | 31 (32.0)             |
| <i>Race/Ethnicity</i>                          |                       |
| White, non-Hispanic                            | 29 (30.5)             |
| Black, non-Hispanic                            | 35 (36.9)             |
| Hispanic                                       | 21 (22.1)             |
| Other                                          | 10 (10.5)             |
| Unknown                                        | 5                     |
| <i>Age at Time of Infection</i>                |                       |
| <18 Years                                      | 3 (3.1)               |
| 18-64 Years                                    | 60 (61.9)             |
| ≥ 65 Years                                     | 34 (35.0)             |
| <i>History of Injection Drug Use</i>           |                       |
| Yes                                            | 13 (13.8)             |
| No                                             | 81 (86.2)             |
| Unknown                                        | 3                     |
| <i>HIV Diagnosis</i>                           |                       |
| Yes                                            | 11 (11.7)             |
| No                                             | 83 (88.3)             |
| Unknown                                        | 3                     |
| <i>Admission Source</i>                        |                       |
| Home <sup>a</sup>                              | 69 (73.4)             |
| NH/Rehab/LTACH/Other Hospital                  | 25 (26.6)             |
| Unknown                                        | 3                     |
| <i>Prior Hospital Admission (90 Days)</i>      |                       |
| Yes                                            | 50 (53.2)             |
| No                                             | 44 (46.8)             |
| Unknown                                        | 3                     |
| <i>Hospital or Community Onset<sup>b</sup></i> |                       |
| HO                                             | 25 (26.6)             |
| HACO                                           | 46 (48.9)             |
| CO                                             | 23 (24.5)             |
| Unknown                                        | 3                     |
| <i>Frequent Healthcare Interaction</i>         |                       |
| Hemodialysis                                   | 11 (13.4)             |
| Infusion Center <sup>c</sup>                   | 14 (17.1)             |
| None                                           | 57 (69.5)             |
| Unknown                                        | 15                    |
| <i>Presence of Invasive Device<sup>d</sup></i> |                       |
| Yes                                            | 63 (67.0)             |
| No                                             | 31 (33.0)             |
| Unknown                                        | 3                     |

|                                                  |           |
|--------------------------------------------------|-----------|
| <i>Invasive Procedures</i> <sup>e</sup>          |           |
| Yes                                              | 34 (36.2) |
| No                                               | 60 (63.8) |
| Unknown                                          | 3         |
| <i>Wound Present, N</i> <sup>f</sup>             |           |
| Yes                                              | 54 (57.4) |
| No                                               | 40 (42.6) |
| Unknown                                          | 3         |
| <i>Charlson Comorbidity Index (CCI)</i>          |           |
|                                                  | N (%)     |
| 0-5                                              | 45 (47.9) |
| > 5                                              | 49 (52.1) |
| Unknown                                          | 3         |
| <i>Comorbidities</i> <sup>g</sup>                |           |
| Myocardial Infarction                            | 8 (8.5)   |
| Congestive Heart Failure                         | 20 (21.3) |
| Peripheral Vascular Disease                      | 11 (11.7) |
| Cerebrovascular Disease                          | 4 (4.3)   |
| Dementia                                         | 7 (7.4)   |
| Chronic Pulmonary Disease                        | 9 (9.6)   |
| Peptic Ulcer Disease                             | 2 (2.1)   |
| Diabetes (no complications)                      | 15 (16.0) |
| Diabetes with Organ Damage                       | 18 (19.1) |
| Para or Hemiplegia                               | 7 (7.4)   |
| Moderate/Severe Renal Disease                    | 26 (27.7) |
| Solid Tumor                                      | 8 (8.5)   |
| Leukemia                                         | 7 (7.4)   |
| Lymphoma/Multiple Myeloma                        | 8 (8.5)   |
| Moderate/Severe Liver Disease                    | 13 (13.8) |
| Metastatic Solid Tumor                           | 5 (5.3)   |
| <i>History of Transplant</i> <sup>h</sup>        |           |
| Yes                                              | 11 (11.7) |
| No                                               | 83 (88.3) |
| Unknown                                          | 3         |
| <i>History of MRSA Colonization</i> <sup>i</sup> |           |
| Yes                                              | 43 (45.7) |
| No                                               | 51 (54.3) |
| Unknown                                          | 3         |
| <i>Presumed Source of MRSA BSI</i>               |           |
| Skin Source                                      | 43 (45.7) |
| Pneumonia                                        | 11 (11.7) |
| Vascular Access                                  | 24 (25.5) |
| Other                                            | 7 (7.4)   |
| Source Truly Unknown                             | 9 (9.6)   |
| Unknown                                          | 3         |
| <i>ICU Admission Prior to BSI</i>                |           |
| Yes                                              | 9 (22.0)  |
| No                                               | 32 (78.0) |
| No ICU Admission                                 | 53        |
| Unknown                                          | 3         |

Abbreviations: HIV, human immunodeficiency virus; NH, nursing home; LTACH, long-term acute care hospital; HO, hospital-onset; HACO, hospital-associated community-onset; CO, community-onset; BSI, blood stream infection; MRSA, methicillin-resistant *Staphylococcus aureus*; ICU, intensive care unit

<sup>a</sup> “Admission from home”: included non-medical residences such as home, group homes, assisted living facilities, and homeless shelters.

<sup>b</sup> “Hospital-onset”: included positive MRSA culture > 3 days after admission.

“Hospital-associated community-onset”: includes a positive MRSA culture ≤ 3 days after admission with presence of at least one risk factor including presence of an invasive device, frequent healthcare interaction, hemodialysis, hospital admission within the past 3 months, or residence at a LTACH, NH, or rehabilitation center.

“Community-onset”: includes a positive MRSA culture ≤ 3 days after admission without presence of risk factors.

<sup>c</sup> “Infusion center”: outpatient centers for chemotherapy, intravenous fluids, intravenous immunomodulators, and blood products.

<sup>d</sup> “Presence of an invasive device”: included pacemaker, implantable cardioverter defibrillator (ICD), left ventricular assist device (LVAD), vascular access (excluding peripheral intravenous catheters), orthopedic hardware, nephrostomy, suprapubic catheter, ileal conduit, foley catheter, arteriovenous graft placement (AVG), percutaneous endoscopic gastrostomy (PEG) tube, or ostomy.

<sup>e</sup> “Invasive procedures”: Included any invasive procedures or surgery occurring within one month prior to first positive blood culture for MRSA, excluding electroencephalogram (EEG), electrocardiogram (EKG), and transthoracic echocardiogram (TTE).

<sup>f</sup> “Wound Present”: Presence of a chronic skin wound overlying the sacrum, limb, abdomen, or other body part.

<sup>g</sup> “Comorbidities”: As defined by the Charleston Comorbidity Index (CCI) refer to standard definitions for CCI.<sup>17</sup>

<sup>h</sup> “History of transplant”: Included solid organ and bone marrow transplant.

<sup>i</sup> “History of MRSA colonization”: Any positive culture from urine, sputum, tissue, or nares with MRSA prior to the positive MRSA blood culture or a documented history of prior MRSA infection or colonization

**Supplementary Table 3. Bacterial strains used, related to STAR Methods.**

| VJT#  | Strain Name                                            | Description                                                                                                | Reference  |
|-------|--------------------------------------------------------|------------------------------------------------------------------------------------------------------------|------------|
| 15.77 | AH-LAC                                                 | Erm <sup>S</sup> USA300 SSTI                                                                               | [S2]       |
| 20.06 | FPR3757                                                | USA300 SSTI                                                                                                | [S3]       |
| 44.45 | SF8300                                                 | USA300 SSTI                                                                                                | [S4]       |
| 47.15 | AH-LAC $\Delta luk$                                    | AH-LAC carrying $\Delta lukAB hlgABC::tet lukED::kan PVL::spec$                                            | [S5]       |
| 66.73 | AH-LAC <i>sarZ::bursa</i>                              | AH-LAC carrying the <i>bursa aurealis</i> transposon in the <i>sarZ</i> gene                               | This study |
| 70.63 | AH-LAC + vector                                        | AH-LAC carrying empty vector pOS1                                                                          | This study |
| 70.65 | AH-LAC <i>sarZ::bursa</i> + vector                     | AH-LAC <i>sarZ::bursa</i> carrying empty vector pOS1                                                       | This study |
| 70.67 | AH-LAC <i>sarZ::bursa</i> + <i>sarZ</i> <sup>WT</sup>  | AH-LAC <i>sarZ::bursa</i> carrying <i>sarZ</i> WT allele (from AH-LAC) under its native promoter on pOS1   | This study |
| 70.69 | AH-LAC <i>sarZ::bursa</i> + <i>sarZ</i> <sup>NS1</sup> | AH-LAC <i>sarZ::bursa</i> carrying <i>sarZ</i> NS1 allele (from ER00385) under its native promoter on pOS1 | This study |
| 70.71 | AH-LAC <i>sarZ::bursa</i> + <i>sarZ</i> <sup>NS2</sup> | AH-LAC <i>sarZ::bursa</i> carrying <i>sarZ</i> NS2 allele (from ER08597) under its native promoter on pOS1 | This study |
| 70.73 | AH-LAC <i>sarZ::bursa</i> + <i>sarZ</i> <sup>FS1</sup> | AH-LAC <i>sarZ::bursa</i> carrying <i>sarZ</i> FS1 allele (from ER00594) under its native promoter on pOS1 | This study |
| 70.75 | AH-LAC <i>sarZ::bursa</i> + <i>sarZ</i> <sup>FS2</sup> | AH-LAC <i>sarZ::bursa</i> carrying <i>sarZ</i> FS2 allele (from ER09970) under its native promoter on pOS1 | This study |
| 83.33 | I1 <i>sarZ::tet</i>                                    | ER00594 carrying <i>sarZ::tet</i>                                                                          | This study |
| 83.42 | I1 <i>sarZ::sarZ</i> <sup>WT</sup>                     | ER00594 <i>sarZ::tet</i> complemented with <i>sarZ</i> WT allele (from AH-LAC)                             | This study |
| 83.39 | H2 <i>sarZ::tet</i>                                    | ER00573 carrying <i>sarZ::tet</i>                                                                          | This study |
| 83.48 | H2 <i>sarZ::sarZ</i> <sup>WT</sup>                     | ER00573 <i>sarZ::tet</i> complemented with <i>sarZ</i> WT allele (from AH-LAC)                             | This study |
| 83.50 | H2 <i>sarZ::tet</i> + vector                           | ER00573 <i>sarZ::tet</i> carrying empty vector pOS1                                                        | This study |
| 83.52 | H2 <i>sarZ::tet</i> + <i>sarZ</i> <sup>WT</sup>        | ER00573 <i>sarZ::tet</i> carrying <i>sarZ</i> WT allele (from AH-LAC) under its native promoter on pOS1    | This study |
| 83.54 | H2 <i>sarZ::tet</i> + <i>sarZ</i> <sup>FS1</sup>       | ER00573 <i>sarZ::tet</i> carrying <i>sarZ</i> FS1 allele (from ER00594) under its native promoter on pOS1  | This study |
| 85.62 | SF8300 <i>sarZ::tet</i>                                | SF8300 carrying <i>sarZ::tet</i>                                                                           | This study |
| 78.86 | I2 <i>clfB::tet</i>                                    | ER02658 carrying <i>clfB::tet</i>                                                                          | This study |
| 85.67 | I2 <i>clfB::clfB</i>                                   | ER02658 <i>clfB::tet</i> complemented with <i>clfB</i>                                                     | This study |
| 85.64 | H2 <i>clfB::tet</i>                                    | ER00573 carrying <i>clfB::tet</i>                                                                          | This study |
| 75.29 | BL21 pET15b- <i>sarZ</i>                               | <i>E. coli</i> BL21 carrying the expression plasmid pET15b- <i>sarZ</i> <sup>WT</sup>                      | This study |
| 84.14 | BL21 pET15b- <i>sarZ</i> <sup>NS1</sup>                | <i>E. coli</i> BL21 carrying the expression plasmid pET15b- <i>sarZ</i> <sup>NS1</sup>                     | This study |
| 84.15 | BL21 pET15b- <i>sarZ</i> <sup>NS2</sup>                | <i>E. coli</i> BL21 carrying the expression plasmid pET15b- <i>sarZ</i> <sup>NS2</sup>                     | This study |



**Supplementary Table 4. List of primers and oligos, related to STAR Methods.**

| <b>Primer Name</b> | <b>Sequence (5'-3')</b>                                      |
|--------------------|--------------------------------------------------------------|
| sarZ-Xmal          | TCCCCCGGGTATAGAAATTTGTATTACAAAGCCATTAT                       |
| sarZ-NheI          | GATCAGCTAGCTATGTAACCTTTTTGCTTATCTATTC                        |
| Up_sarZ_pIMAY_F    | CTAAAGGGAACAAAAGCTGGGTACCTGAAGGCACTAAACTGCT<br>TCAC          |
| Up_sarZ_tet-R      | TACCAATATTTGTTATTTTACAATCCCAATCACTCCTTGTTAAAA<br>TAAACAATAT  |
| Down_sarZ_tet_F    | TTTCTTGCTTCATTGATACCTTTTGCTCCCTATCATAAGGTGAT<br>GGG          |
| Down_sarZ_pIMAY_R  | TGGATCCCCCGGGCTGCAGGAATCCCATGCGTCATTTATACC<br>AAAAAG         |
| tetM_F             | GATTGTAATAAACAATATTGGTACATG                                  |
| tetM_R             | CAAAGGTATCAATGAAGCAAGAAATATTG                                |
| pIMAY_F            | GGTACCCAGCTTTTGTTCCCTTTAGTGAGG                               |
| pIMAY_R            | GAATTCCTGCAGCCCGGGG                                          |
| clfB_UP_pIMAY_F    | CTCTAGAAGTAGTGGATCCCCCGGGCAAGTATTATTTCCAAT<br>CAGTAAC        |
| clfB_UP_tet_R      | TACCAATATTTGTTATTTTACAATCAAATATTACTCCATTTCAAT<br>TTCTAGATTAG |
| clfB_DOWN_pIMAY_R  | GCTGGGTACCGGGCCCCCCTCGAGCTTCAAATTGATAAGGA<br>ACATTTATGC      |
| clfB_DOWN_tet_F    | TTTCTTGCTTCATTGATACCTTTTGATACTTTTTTAGGCCGAATA<br>CATTTG      |
| pOS1_1_F           | TCAGGGGATAACGCAGGAAAG                                        |
| pOS1_1_R           | ATGAGCAAAGGAGAAGAACTTTTCA                                    |
| pOS1_2_F           | TGTTCTTTCCTGCGTTATCCCCTGATTCTGTGGATAACCGTATT<br>ACCGC        |
| pOS1_2_R           | CTGCAGCCAAGCTAGCTTGT                                         |
| sarZ_NdeI          | CCCCCATATGTATGTAGAAAACAGCTATCTTAGCAAAC                       |
| sarZ_STOP_BamHI    | CCCGGATCCTTATTTTTTGTCGGAATAGTCAAATTTTTAG                     |
| rpoB_F             | GAACATGCAACGTCAAGCAG                                         |
| rpoB_R             | AATAGCCGCACCAGAATCAC                                         |
| rpoB_probe         | TACAGGTATGGAACACGTTGCAGCA                                    |
| clfB_F             | CACAAACAGTGCGAATGTAGATAG                                     |
| clfB_R             | CGGTTGAGGTGTTTCATTTGTT                                       |
| clfB_probe         | AGCAATACCACTACAACAGAGCCAGC                                   |
| sspA_F             | ATCGTCACCAAATCACAGATACA                                      |
| sspA_R             | ACAACACTACCCGGAAGCAATAA                                      |
| sspA_probe         | ACGAATGGTCATTATGCACCCGTAAC                                   |
| aur_F              | GGTCGCACATTCACAAGTTTATC                                      |
| aur_R              | CGCCTGACTGGTCCTTATATTC                                       |
| aur_probe          | CGGTGTGACACAAGAGACAGCGAA                                     |
| pSsp_F             | AATTCATAGTACGTTTCAGTT                                        |
| pSsp_R             | CTAAAAACCTCCAAAAAATT                                         |
| pSsp_R_biotin      | CTAAAAACCTCCAAAAAATT                                         |
| pClfB_F            | TATACAATGTAAAATGAATAA                                        |
| pClfB_R            | AAATATTACTCCATTTCAATT                                        |
| pClfB_R_biotin     | AAATATTACTCCATTTCAATT                                        |

|                |                      |
|----------------|----------------------|
| pPurA_F        | AAAAGTTTTTCCGTACAATA |
| pPurA_R_biotin | ACATGTGAGCACCTCCAAGT |
| pPurA_biotin   | ACATGTGAGCACCTCCAAGT |

## SUPPLEMENTAL REFERENCES

1. Sullivan, M.J., N.K. Petty, and S.A. Beatson. (2011). *Easyfig: a genome comparison visualizer*. *Bioinformatics*. **27**(7): p. 1009-10.
2. Boles, B.R., et al. (2010). *Identification of genes involved in polysaccharide-independent Staphylococcus aureus biofilm formation*. *PLoS One*. **5**(4): p. e10146.
3. Diep, B.A., et al. (2006). *Complete genome sequence of USA300, an epidemic clone of community-acquired methicillin-resistant Staphylococcus aureus*. *The Lancet*. **367**(9512): p. 731-739.
4. Diep, B.A., et al. (2008). *Contribution of Panton-Valentine leukocidin in community-associated methicillin-resistant Staphylococcus aureus pathogenesis*. *PLoS One*. **3**(9): p. e3198.
5. Blake, K.J., et al. (2018). *Staphylococcus aureus produces pain through pore-forming toxins and neuronal TRPV1 that is silenced by QX-314*. *Nat Commun*. **9**(1): p. 37.
